# Supplementary material for: Preparation of porous nanocarbons with tunable morphology and pore size from copolymer templated precursors
Source: Royal Society of Chemistry journal article supplement (doi:10.1039/c3mh00084b), 2013-09-20
Supplement: c3mh00084b.pdf [file c3mh00084b.pdf]

## Supporting Information

# Preparation of porous nanocarbons with tunable morphology and pore size from copolymer templated precursors

Mingjiang Zhong,<sup>a</sup> Chuanbing Tang,<sup>\*b</sup> Eun Kyung Kim,<sup>a,c</sup> Michal Kruk,<sup>a,d</sup> Ewa B. Celer,<sup>e</sup> Mietek Jaroniec,<sup>e</sup> Krzysztof Matyjaszewski,<sup>\*a</sup> and Tomasz Kowalewski<sup>\*a</sup>

<sup>a</sup> Department of Chemistry, Carnegie Mellon University, 4400 Fifth Avenue, Pittsburgh, Pennsylvania 15213, United States

<sup>b</sup> Department of Chemistry and Biochemistry, University of South Carolina, Columbia, 631 Sumter Street, Columbia, South Carolina 29208, United States

<sup>c</sup> Current address: Battery R&D, AMD PJT, LG Chem Research Park, LG Chem, 104-1, Moonji-dong, Yuseong-gu, Daejeon, 305-738, Korea

<sup>d</sup> Current address: Department of Chemistry, College of Staten Island and Graduate Center, City University of New York, 2800 Victory Boulevard, Building 6S-241, Staten Island, New York 10314, United States

<sup>e</sup> Department of Chemistry, Kent State University, Kent, Ohio 44242, United States

\*To which all correspondences should be addressed: [tang4@mailbox.sc.edu](mailto:tang4@mailbox.sc.edu), [km3b@andrew.cmu.edu](mailto:km3b@andrew.cmu.edu), [tomek@andrew.cmu.edu](mailto:tomek@andrew.cmu.edu)

## Experimental Materials and Methods

**Materials:** Acrylonitrile (AN), *n*-butyl acrylate (BA), methyl 2-bromopropionate (MBP), *N,N,N',N'',N'''*-pentamethyldiethylenetriamine (PMDETA), 2,2'-bipyridine (bpy), CuBr, CuCl, CuBr<sub>2</sub>, anisole, dimethylformamide (DMF), dimethylsulfoxide (DMSO), tetrahydrofuran (THF), and methanol were all obtained from Sigma-Aldrich. CuCl and CuBr were purified by stirring in glacial acetic acid followed by washing with ether and dried overnight under vacuum. Monomers were passed through a basic alumina column prior to use. All other chemicals were used as received.

**Synthesis and film preparation:** The majority of diblock copolymers employed in the present research were prepared by ATRP with halogen exchange, as described in our earlier studies.<sup>1</sup> Monofunctional bromine-terminated poly(*n*-butyl acrylate) (PBA) homopolymer was synthesized as a macroinitiator to be chain-extended with polyacrylonitrile (PAN) and thus to yield the desired PAN-*b*-PBA diblock copolymer. Thin film samples of block copolymers were prepared by drop-casting copolymer solutions (10 mg/mL) in dimethylformamide onto cleaned silicon wafer substrates (*n*-type, Silicon Quest, Inc.). The films were thoroughly dried in a vacuum chamber at room temperature and then annealed at 160 °C. Typical film thickness ranged from several hundred nanometers to few micrometers, as measured by AFM. The PAN-*b*-PBA copolymers (for both thin films and bulk materials) were converted into carbonaceous materials through heating under air to 280 °C at a rate of 20 °C/min and maintaining at 280 °C for 1 h; subsequent heating under nitrogen to target temperature (600 °C) at a rate of 10 °C/min and keeping at this target temperature for certain time and finally naturally cooling to room temperature.

**Characterization:** Tapping mode atomic force microscopy (TMAFM) studies were carried out with the aid of a NanoScope III-M system (Digital Instruments, Santa Barbara, CA), equipped with a J-type vertical engage scanner. The AFM observations were performed at room temperature under air using silicon cantilevers with spring constant of 20 - 80 N/m and nominal resonance frequency of 230-410 kHz (TappingMode Etched Silicon Probes). Morphologies of carbon powders and thin films obtained through the stabilization and carbonization of PAN-*b*-PBA copolymers were studied with the aid of transmission electron microscopy (TEM) (JEOL JEM-2000 EX II with acceleration voltage 200 kV). Nitrogen adsorption measurements were carried out at -196°C on a Micrometritics ASAP 2010 volumetric gas adsorption analyzer. Prior to measurements, samples were degassed at 300 °C under vacuum overnight. Brunauer–Emmett–Teller (BET) surface areas were determined from N<sub>2</sub> adsorption isotherms at 77 K. Multipoint BET measurements were performed at relative pressures ( $P/P_0$ ) in the range of 0.05 - 0.2. The mesopore size distribution was obtained from Barrett-Joyner-Halenda (BJH) method from the desorption branch.

**Table S1.** Morphologies of thin films of PAN-*b*-PBA diblock copolymers determined from TMAFM image.

| Sample Code | Composition (DP <sub>BA</sub> /DP <sub>AN</sub> ) | $M_w/M_n$ (from GPC) | wt%(AN) | Morphology of PAN Domains    |
|-------------|---------------------------------------------------|----------------------|---------|------------------------------|
| P1          | 202/17                                            | 1.17                 | 3.4     | <i>No phase contrast</i>     |
| P2          | 240/36                                            | 1.23                 | 5.8     | <i>Spherical</i>             |
| P3          | 90/22                                             | 1.12                 | 9.2     | <i>Spherical</i>             |
| P4          | 240/104                                           | 1.23                 | 15.2    | <i>Cylindrical</i>           |
| P5          | 240/124                                           | 1.22                 | 17.6    | <i>Cylindrical</i>           |
| P6          | 202/106                                           | 1.30                 | 17.8    | <i>Cylindrical</i>           |
| P7          | 90/59                                             | 1.22                 | 21.2    | <i>Cylindrical/ Lamellar</i> |
| P8          | 90/84                                             | 1.20                 | 27.9    | <i>Cylindrical/ Lamellar</i> |
| P9          | 40/67                                             | 1.10                 | 40.9    | <i>Branched</i>              |
| P10         | 70/99                                             | 1.25                 | 36.9    | <i>Branched</i>              |
| P11         | 78/114                                            | 1.20                 | 37.7    | <i>Branched</i>              |
| P12         | 90/128                                            | 1.36                 | 37.1    | <i>Branched</i>              |
| P13         | 90/159                                            | 1.25                 | 42.2    | <i>Branched</i>              |
| P14         | 117/180                                           | 1.30                 | 38.9    | <i>Branched</i>              |
| P15         | 141/245                                           | 1.28                 | 41.8    | <i>Branched</i>              |
| P16         | 173/305                                           | 1.35                 | 42.2    | <i>Branched</i>              |

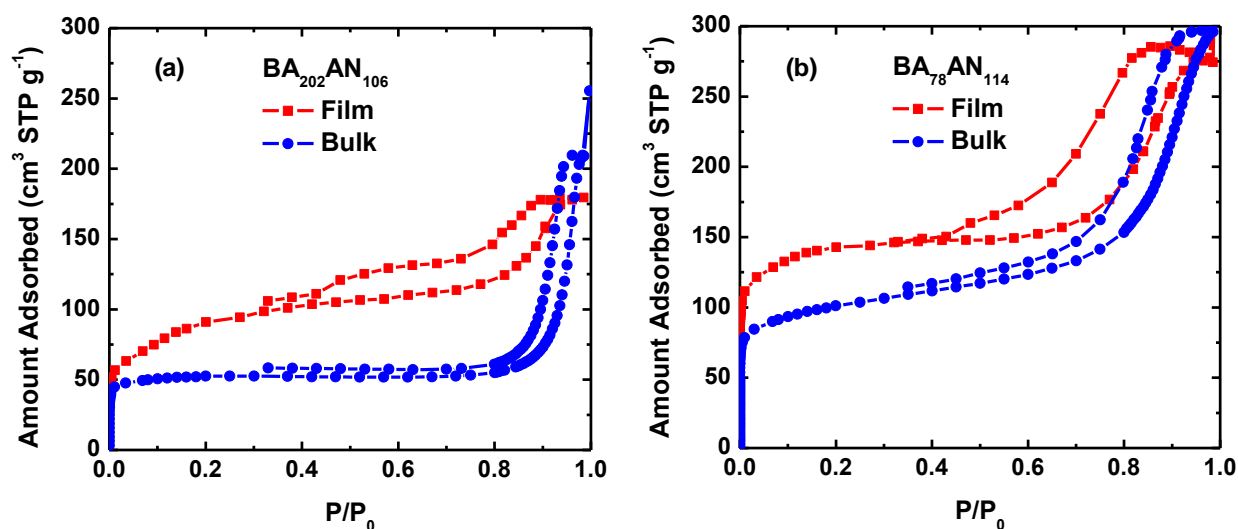

**Fig. S1**  $N_2$  adsorption/desorption isotherms at  $-196^\circ C$  thin film and bulk CTNCs from (a)  $BA_{202}AN_{106}$ ; (b)  $BA_{78}AN_{114}$ .

## References

1. (a) C. Tang, T. Kowalewski and K. Matyjaszewski, *Macromolecules*, 2003, **36**, 1465; (b) C. Tang, T. Kowalewski and K. Matyjaszewski, *Macromolecules*, 2003, **36**, 8587.
